# Supplementary material
Source: PubMed Central journal article supplement (PMC3405605)

**A**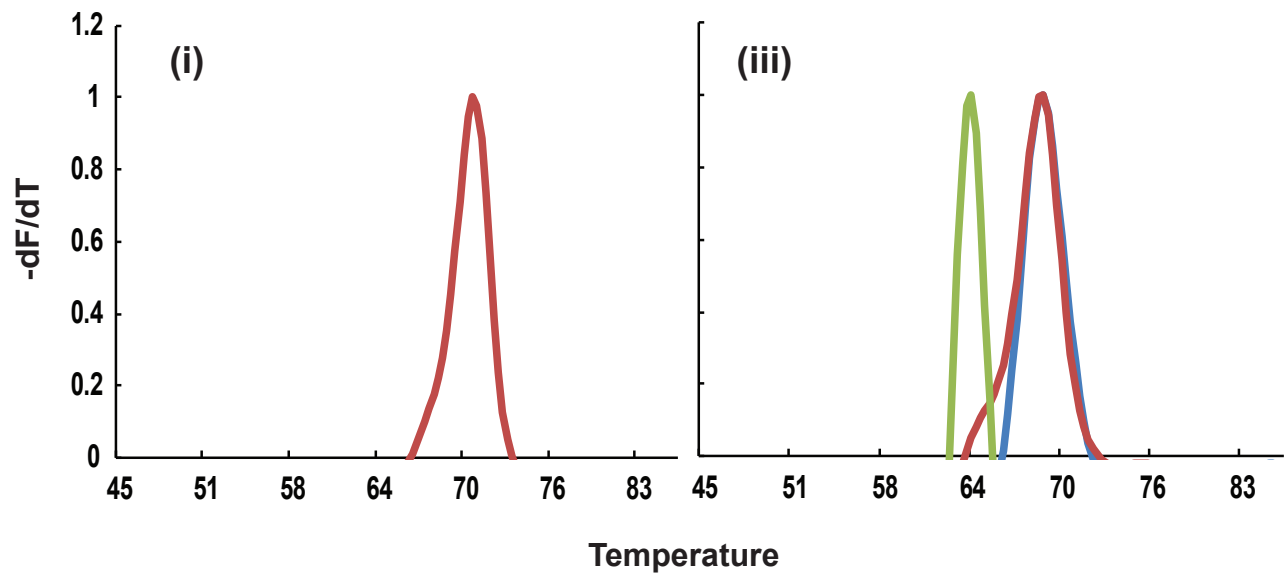**B**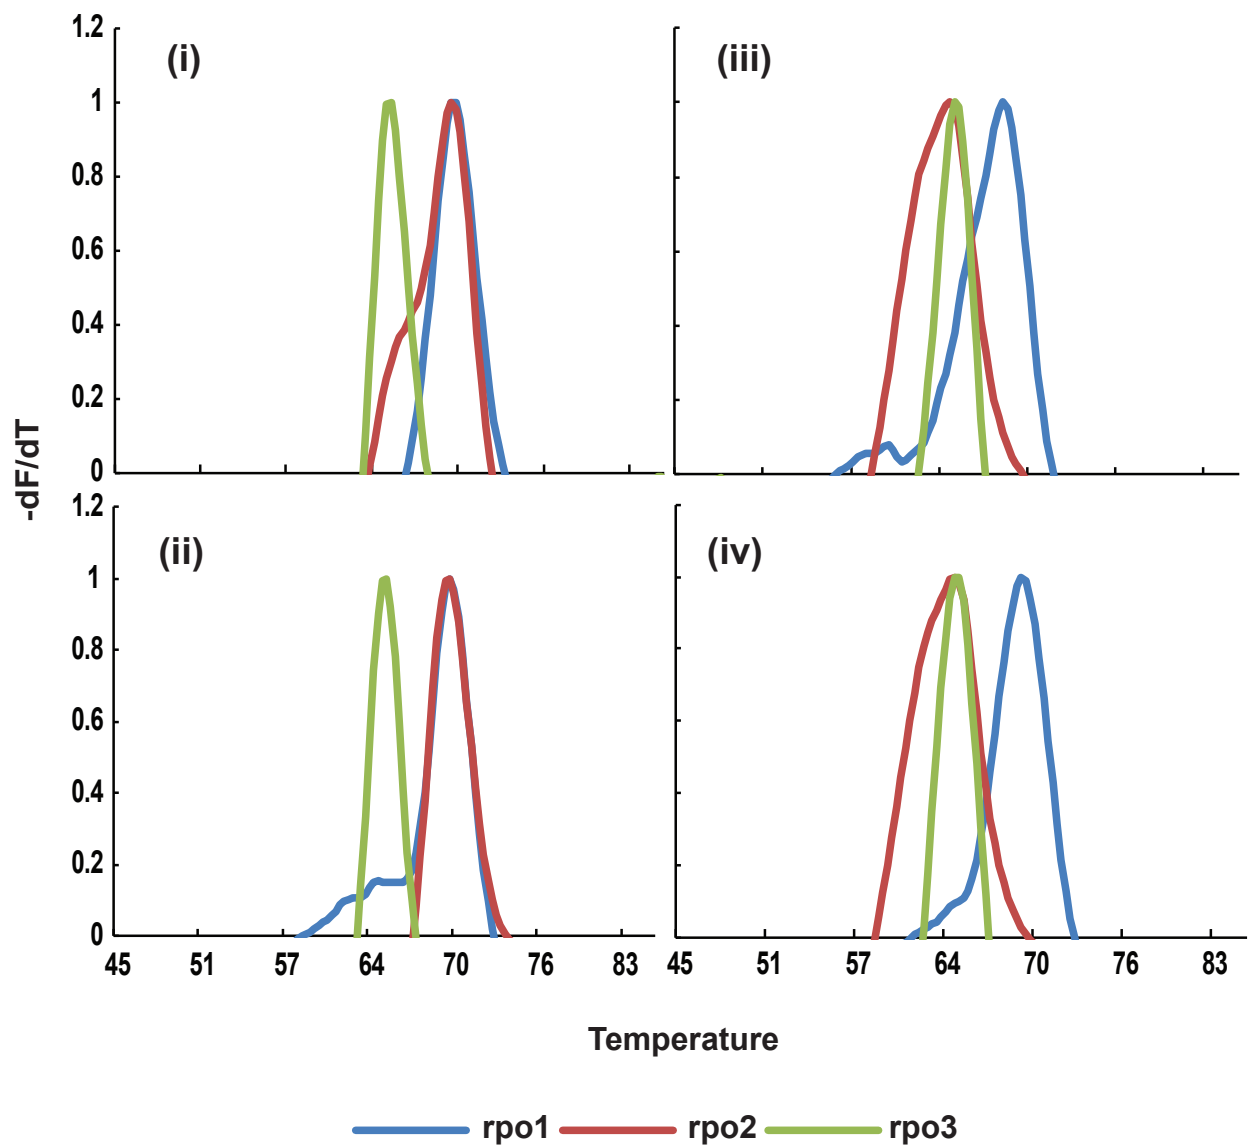

Supplement: supp_50.7.2194_JCM-JCM00143-12-s01.pdf [file supp_50.7.2194_JCM-JCM00143-12-s01.pdf]
